# Supplementary material for: Chinese Herbal Medicine for Mild Cognitive Impairment: A Systematic Review of Randomized Controlled Trials
Source: PubMed Central journal article supplement (PMC9279622; doi:10.3389/fneur.2022.903224), 2022-06-30
Supplement: Data_Sheet_1.pdf [file Data_Sheet_1.pdf]

## Supplementary Files

### 1. Supplementary Tables

#### Supplementary Table 1

##### Searching strategy

| Data sources     | Search terms                                                                                                                                                                                                                                                                                                                                                                                                                                                                                                                                                                                                                                                                                           |
|------------------|--------------------------------------------------------------------------------------------------------------------------------------------------------------------------------------------------------------------------------------------------------------------------------------------------------------------------------------------------------------------------------------------------------------------------------------------------------------------------------------------------------------------------------------------------------------------------------------------------------------------------------------------------------------------------------------------------------|
| PubMed           | #1 Medicine, Chinese Traditional [Mesh]<br>#2 Traditional Chinese medicine [Title/ Abstract]<br>#3 Chinese herbal medicine [Title/ Abstract]<br>#4 Chinese material medica [Title/ Abstract]<br>#5 Chinese proprietary medicine [Title/ Abstract]<br>#6 Chinese patent medicine [Title/ Abstract]<br>#7 Gingko [Title/ Abstract]<br>#8 Congrongyizhi [Title/ Abstract]<br>#9 #1 OR #2 OR #3 OR #4 OR #5 OR #6 OR #7 OR #8<br>#10 Mild cognitive impairment [Title/ Abstract]<br>#11 MCI [Title/ Abstract]<br>#12 #10 OR #11<br>#13 RCT [All fields]<br>#14 random [All fields]<br>#15 randomized [All fields]<br>#16 randomised [All fields]<br>#17 #13 OR #14 OR #15 OR #16<br>#18 #9 AND #12 AND #17 |
| Cochrane Library | #1 (Traditional Chinese medicine):ti,ab,kw OR (Chinese herbal medicine):ti,ab,kw OR (Chinese material medica):ti,ab,kw OR (Chinese proprietary medicine):ti,ab,kw OR (Chinese patent medicine):ti,ab,kw OR (Gingko):ti,ab,kw OR (Congrongyizhi):ti,ab,kw<br>#2 (Mild cognitive impairment):ti,ab,kw OR (MCI):ti,ab,kw<br>#3 (RCT) OR (random) OR (randomized) OR (randomised)<br>#4 #1 AND #2 AND #3                                                                                                                                                                                                                                                                                                   |
| CNKI (Chinese)   | #1 SU=("轻度认知障碍"+"轻度认知损害"+"轻度认知损伤"+"轻度认知缺损"+"轻度认知减退"+"轻度认知受损"+"轻度认知功能障碍"+"轻度认知功能损害"+"轻度认知功能损伤"+"轻度认知功能缺损"+"轻度认知功能减退" + "轻度认知功能受损")<br>#2 SU=("中药"+"草药"+"中草药"+"中成药"+"成药" + "复方"+"汤剂"+"方剂"+"中西医"+"中医")<br>#3 FT=("随机"+"盲法"+"安慰剂")<br>#4 #1 AND #2 AND #3                                                                                                                                                                                                                                                                                                                                                                                                                                                  |
| Wanfang Database | #1 主题:"轻度认知障碍"+主题:"轻度认知损害"+主题:"轻度认知损伤"+主题:"                                                                                                                                                                                                                                                                                                                                                                                                                                                                                                                                                                                                                                                            |

|                                       |                                                                                                                                                                                                                                                                                                                                                                                                                                                                                                                                                                                                                                                       |
|---------------------------------------|-------------------------------------------------------------------------------------------------------------------------------------------------------------------------------------------------------------------------------------------------------------------------------------------------------------------------------------------------------------------------------------------------------------------------------------------------------------------------------------------------------------------------------------------------------------------------------------------------------------------------------------------------------|
| (Chinese)                             | <p>轻度认知缺损"+主题:"轻度认知减退" +主题:"轻度认知受损"+主题:"轻度认知功能障碍"+主题:"轻度认知功能损害"+主题:"轻度认知功能损伤"+主题:"轻度认知功能缺损"+主题:"轻度认知功能减退"+主题:"轻度认知功能受损"</p> <p>#2 主题:"中药"+主题:"草药"+主题:"中草药"+主题:"中成药"+主题:"成药"+主题:"复方"+主题:"汤剂"+主题:"方剂"+主题:"中西医"+主题:"中医"</p> <p>#3 全部:"随机"+全部:"盲法"+全部:"安慰剂"</p> <p>#4 #1 AND #2 AND #3</p>                                                                                                                                                                                                                                                                                                                                                                |
| Chongqing<br>VIP (CQVIP)<br>(Chinese) | <p>#1 题名或关键词: 轻度认知功能障碍+mild cognitive impairment+slight cognition disfunction+轻度认知功能损害+轻度认知障碍+轻度认知功能损伤+轻度认知损害+轻度认知损伤+轻微认知功能损害+轻度认知缺损+轻度认知功能缺损+轻度认知减退+轻度认知功能减退+轻度认知受损+轻度认知功能受损</p> <p>#2 题名或关键词: 中药+草药+中草药+中成药+成药+复方+汤剂+方剂+中西医+中医</p> <p>#3 #1 AND #2</p>                                                                                                                                                                                                                                                                                                                                                                                              |
| Sinomed<br>(Chinese)                  | <p>#1 “轻度认知障碍”[加权:扩展]</p> <p>#2 “轻度认知障碍”[常用字段:智能] OR “轻度认知损害”[常用字段:智能] OR “轻度认知损伤”[常用字段:智能] OR “轻度认知缺损”[常用字段:智能] OR “轻度认知减退”[常用字段:智能] OR “轻度认知受损”[常用字段:智能] OR “轻度认知功能障碍”[常用字段:智能] OR “轻度认知功能损害”[常用字段:智能] OR “轻度认知功能损伤”[常用字段:智能] OR “轻度认知功能缺损”[常用字段:智能] OR “轻度认知功能减退”[常用字段:智能] OR “轻度认知功能受损”[常用字段:智能] OR “轻微认知功能损害”[常用字段:智能]</p> <p>#3 (#1) OR (#2)</p> <p>#4 “中药”[常用字段:智能] OR “草药”[常用字段:智能] OR “中草药”[常用字段:智能] OR “中成药”[常用字段:智能] OR “成药”[常用字段:智能] OR “复方”[常用字段:智能] OR “汤剂”[常用字段:智能] OR “方剂”[常用字段:智能] OR “中西医”[常用字段:智能] OR “中医”[常用字段:智能]</p> <p>#5 (#3) AND (#4)</p> <p>#6 “随机”[全部字段:智能] OR “盲法”[全部字段:智能] OR “安慰剂”[全部字段:智能]</p> <p>#7 (#5) AND (#6)</p> |

## Supplementary Table 2

### The composition of Chinese herbal medicine explored in the included trials

| Chinese herbal medicine  | Composition (Latin binomial name)                                                                                                                                                                                                                                                                                                                                                                                                                                                                                                                                                                                                                                                                                                                                                                                                  |
|--------------------------|------------------------------------------------------------------------------------------------------------------------------------------------------------------------------------------------------------------------------------------------------------------------------------------------------------------------------------------------------------------------------------------------------------------------------------------------------------------------------------------------------------------------------------------------------------------------------------------------------------------------------------------------------------------------------------------------------------------------------------------------------------------------------------------------------------------------------------|
| Ginkgo leaf extracts     | yín xìng yè ( <i>Folium Ginkgo</i> )                                                                                                                                                                                                                                                                                                                                                                                                                                                                                                                                                                                                                                                                                                                                                                                               |
| Tongxinluo capsule       | rén shēn ( <i>Radix et Rhizoma Ginseng</i> ); shuǐ zhì ( <i>Hirudo</i> ); quán xiē ( <i>Scorpio</i> ); chì sháo ( <i>Radix Paeoniae Rubra</i> ); chán tuì ( <i>Periostracum Cicadae</i> ); tǔ biē chóng ( <i>Eupolyphaga seu Steleophaga</i> ); wú gōng ( <i>Scolopendra</i> ); tán xiāng ( <i>Lignum Santali Albi</i> ); jiàng xiāng ( <i>Lignum Dalbergiae Odoriferae</i> ); rǔ xiāng ( <i>Olibanum</i> ); suān zǎo rén (fried) ( <i>Semen Ziziphi Spinosa</i> ); bīng piàn ( <i>Borneolum Syntheticum</i> )                                                                                                                                                                                                                                                                                                                     |
| Liu Wei Di Huang pill    | shú dì huáng ( <i>Radix Rehmanniae Praeparata</i> ); shān zhū yú (prepared) ( <i>Fructus Corni</i> ); mǔ dān pí ( <i>Cortex Moutan</i> ); shān yào ( <i>Rhizoma Dioscoreae</i> ); fú líng ( <i>Poria</i> ); zé xiè ( <i>Rhizoma Alismatis</i> )                                                                                                                                                                                                                                                                                                                                                                                                                                                                                                                                                                                    |
| Yangxue Qingnao granules | dāng guī ( <i>Radix Angelicae Sinensis</i> ); chuān xiōng ( <i>Rhizoma Chuanxiong</i> ); bái sháo ( <i>Radix Paeoniae Alba</i> ); shú dì huáng; gōu téng ( <i>Ramulus Uncariae Cum Uncis</i> ); jī xuè téng ( <i>Caulis Spatholobi</i> ); xià kǔ cǎo ( <i>Spica Prunellae</i> ); jué míng zǐ ( <i>Semen Cassiae</i> ); zhēn zhū mǔ ( <i>Concha Margaritiferae Usta</i> ); yán hú suǒ ( <i>Rhizoma Corydalis</i> ); xī xīn ( <i>Radix et Rhizoma Asari</i> )                                                                                                                                                                                                                                                                                                                                                                        |
| Gui Ling Ji capsule      | hóng shēn ( <i>Radix et Rhizoma Ginseng Rubra</i> ); lù róng ( <i>Cornu Cervi Pantotrichum</i> ); hǎi mǎ ( <i>Hippocampus</i> ); gōu qǐ zǐ ( <i>Fructus Lycii</i> ); dīng xiāng ( <i>Flos Caryophylli</i> ); chuān shān jiǎ ( <i>Squama Manitis</i> ); què nǎo ( <i>Passer montanus (Linnaeus)</i> ); niú xī ( <i>Radix Achyranthis Bidentatae</i> ); suǒ yáng ( <i>Herba Cynomorii</i> ); shú dì huáng; bǔ gǔ zhī ( <i>Fructus Psoraleae</i> ); tǔ sī zǐ ( <i>Semen Cuscutae</i> ); dù zhòng ( <i>Cortex Eucommiae</i> ); shì yān ( <i>Cyrtiospirifer sinensis (Grabn.)</i> ); ròu cōng róng ( <i>Herba Cistanches</i> ); gān cǎo ( <i>Radix et Rhizoma Glycyrrhizae</i> ); tiān dōng ( <i>Radix Asparagi</i> ); yín yáng huò ( <i>Herba Epimedii</i> ); dà qīng yán ( <i>Halitum</i> ); shā rén ( <i>Fructus Amomi</i> ); et al. |

---

|                                                  |                                                                                                                                                                                                                                                                                                                                                                                                                                                                                                                                                                                                                                                                                                                                                                                                                                    |
|--------------------------------------------------|------------------------------------------------------------------------------------------------------------------------------------------------------------------------------------------------------------------------------------------------------------------------------------------------------------------------------------------------------------------------------------------------------------------------------------------------------------------------------------------------------------------------------------------------------------------------------------------------------------------------------------------------------------------------------------------------------------------------------------------------------------------------------------------------------------------------------------|
| Astragalus injection                             | huáng qí ( <i>Radix Astragali</i> )                                                                                                                                                                                                                                                                                                                                                                                                                                                                                                                                                                                                                                                                                                                                                                                                |
| Qizhi Tongluo capsule                            | shuǐ zhì; dì lóng ( <i>Pheretima</i> ); quán xiē; tǔ biē chóng; jiāng cán ( <i>Bombyx Batryticatus</i> ); bīng piàn; huáng qí; dān shēn ( <i>Radix et Rhizoma Salviae Miltiorrhizae</i> ); hóng huā ( <i>Flos Carthami</i> ); zé lán ( <i>Herba Lycopi</i> ); yù jīn ( <i>Radix Curcumae</i> ); dāng guī; jī xuè téng; rén shēn; dǎn nán xīng ( <i>Arisaema cum Bile</i> ); chì sháo; tiān má ( <i>Rhizoma Gastrodiae</i> ); jiāng huáng ( <i>Rhizoma Curcumae Longae</i> ); chuān xiōng; máo dōng qīng ( <i>Radix Ilex Pubescens</i> ); mài dōng ( <i>Radix Ophiopogonis</i> ); wǔ wèi zǐ ( <i>Fructus Schisandrae Chinensis</i> ); zhū yá zào ( <i>Fructus Gleditsiae Abnormalis</i> ); qiāng huó ( <i>Rhizoma et Radix Notopterygii</i> ); ròu guì ( <i>Cortex Cinnamomi</i> ); hé shǒu wū ( <i>Radix Polygoni Multiflori</i> ) |
| Tianmeng oral liquid                             | cì wǔ jiǎ ( <i>Radix et Rhizoma seu Caulis Acanthopanax Senticosi</i> ); huáng jīng ( <i>Rhizoma Polygonati</i> ); can e ( <i>Bombyx mori</i> ); sāng shèn ( <i>Fructus Mori</i> ); dǎng shēn ( <i>Radix Codonopsis</i> ); huáng qí; shā rén; gǒu qǐ zǐ; shān zhā ( <i>Fructus Crataegi</i> ); shù dì huáng; yín yáng huò (prepared); chén pí ( <i>Pericarpium Citri Reticulatae</i> ); fú líng; mǎ qián zǐ ( <i>Semen Strychni</i> )(prepared); fǎ bàn xià ( <i>Rhizoma Pinelliae Praeparatum</i> ); zé xiè; shān yào                                                                                                                                                                                                                                                                                                             |
| Compound sea snake capsule                       | Hǎi Shé ( <i>Pelamis platurus</i> ), hǎi shēn ( <i>Stichopus</i> ); yuǎn zhì ( <i>Radix Polygalae</i> ); shí chāng pú ( <i>Rhizoma Acori Tatarinowii</i> )                                                                                                                                                                                                                                                                                                                                                                                                                                                                                                                                                                                                                                                                         |
| Compound Congrong Yizhi capsule (Bushen capsule) | hé shǒu wū; ròu cōng róng; dì lóng; lòu lú ( <i>Radix Rhapontici</i> ); hé yè ( <i>Folium Nelumbinis</i> )                                                                                                                                                                                                                                                                                                                                                                                                                                                                                                                                                                                                                                                                                                                         |
| Jiannao Bushen                                   | rén shēn; lù róng; gǒu shèn ( <i>Peni et Testes Canitis</i> ); ròu guì; Jīn Niú Cǎo ( <i>Polygala arvensis Willd</i> );                                                                                                                                                                                                                                                                                                                                                                                                                                                                                                                                                                                                                                                                                                            |

---

|                               |                                                                                                                                                                                                                                                                                                                                                                                                                                                                                                                                                                                                                                                               |
|-------------------------------|---------------------------------------------------------------------------------------------------------------------------------------------------------------------------------------------------------------------------------------------------------------------------------------------------------------------------------------------------------------------------------------------------------------------------------------------------------------------------------------------------------------------------------------------------------------------------------------------------------------------------------------------------------------|
| pill                          | niú bàng zǐ ( <i>Fructus Arctii</i> )(fried); jīn yīng zǐ ( <i>Fructus Rosae Laevigatae</i> ); dù zhòng (Charcoal); chuān niú xī ( <i>Radix Cyathulae</i> ); jīn yín huā ( <i>Flos Lonicerae Japonicae</i> ); lián qiào ( <i>Fructus Forsythiae</i> ); chán tuì; shān yào; yuǎn zhì (prepared with Licorice water); suān zǎo rén; shā rén; dāng gū; lóng gǔ ( <i>Fossilium Ossis Mastodi</i> )(Calcined); mǔ lì ( <i>Concha Ostreae</i> )(Calcined); fú líng; bái zhú ( <i>Rhizoma Atractylodis Macrocephalae</i> )(fried with bran); guì zhī ( <i>Ramulus Cinnamomi</i> ); gān cǎo; bái sháo (fried with liqueur); dòu kòu ( <i>Fructus Amomi Rotundus</i> ) |
| Shenzhiling oral liquid       | dǎng shēn; guì zhī; bái sháo; zhì gān cǎo ( <i>Radix et Rhizoma Glycyrrhizae Praeparata cum Melle</i> ); fú líng; gān jiāng ( <i>Rhizoma Zingiberis</i> ); yuǎn zhì (prepared); shí chāng pú; lóng gǔ; mǔ lì                                                                                                                                                                                                                                                                                                                                                                                                                                                  |
| Jinsiwei pill                 | ròu cōng róng; gǒu qǐ zǐ; shí chāng pú; yuǎn zhì; chuān xiōng, et al.                                                                                                                                                                                                                                                                                                                                                                                                                                                                                                                                                                                         |
| Tianzhi granules              | tiān má; gōu téng; shí jué míng ( <i>Concha Haliotidis</i> ); dù zhòng; sāng jì shēng ( <i>Herba Taxilli</i> ); fú shén ( <i>Sclerotium Poriae Pararadicis</i> ); shǒu wū téng ( <i>Caulis Polygoni Multiflori</i> ); huái huā ( <i>Flos Sophorae</i> ); zhī zǐ ( <i>Fructus Gardeniae</i> ); huáng qín ( <i>Radix Scutellariae</i> ); chuān niú xī; yì mǔ cǎo ( <i>Herba Leonuri</i> )                                                                                                                                                                                                                                                                       |
| Xuanyunning tablet            | zé xiè; bái zhú; fú líng; fǎ bàn xià; nǚ zhēn zǐ ( <i>Fructus Ligustri Lucidi</i> ); mò hàn lián ( <i>Herba Ecliptae</i> ); jú huā ( <i>Flos Chrysanthemi</i> ); niú xī; chén pí; gān cǎo                                                                                                                                                                                                                                                                                                                                                                                                                                                                     |
| Fufang Huonao Shu             | Zhū Nǎo ( <i>Sus scrofa domestica Brisson</i> ); wǔ wèi zǐ; mài dōng; rén shēn; gǒu qǐ zǐ; dì huáng ( <i>Radix Rehmanniae</i> ); dān shēn                                                                                                                                                                                                                                                                                                                                                                                                                                                                                                                     |
| Yindanxinnaotong soft capsule | yín xìng yè; dān shēn; dēng zhǎn xì xīn ( <i>Herba Erigerontis</i> ); sān qī ( <i>Radix et Rhizoma Notoginseng</i> ); shān zhā; jiǎo gǔ lán ( <i>Rhizoma seu Herba Gynostemmatis Pentaphylli</i> ); dà suàn ( <i>Bulbus Allii</i> ); tiān rán bīng piàn ( <i>Borneolum</i> )                                                                                                                                                                                                                                                                                                                                                                                  |
| Shuganjieyu                   | guàn yè jīn sī táo ( <i>Herba Hyperici Perforati</i> ); cì wǔ jiǎ                                                                                                                                                                                                                                                                                                                                                                                                                                                                                                                                                                                             |

---

|                      |                                                                                                                                                                                                                                    |
|----------------------|------------------------------------------------------------------------------------------------------------------------------------------------------------------------------------------------------------------------------------|
| capsule              |                                                                                                                                                                                                                                    |
| Nao Li Bao pills     | yuǎn zhì; dì huáng; wǔ wèi zǐ; dì gǔ pí (Cortex Lycii); tù sī zǐ; fú líng; shí chāng pú; chuān xiōng                                                                                                                               |
| Huan Shao capsules   | ròu cōng róng; bā jǐ tiān (Radix Morindae Officinalis); xiǎo huí xiāng (Fructus Foeniculi); shú dì huáng; gōu qǐ zǐ; dù zhòng; niú xī; fú líng; shān yào; shān zhū yú; wǔ wèi zǐ; yuǎn zhì; shí chāng pú; dà zǎo (Fructus Jujubae) |
| Sailuotong           | rén shēn; yín xìng yè; xī hóng huā (Stigma Croci)                                                                                                                                                                                  |
| Memo                 | yín xìng yè; rén shēn; feng wang jiang ( <i>Apis cerana Fabr/ Apis mellifera L.</i> )                                                                                                                                              |
| Xinnaoning capsule   | yín xìng yè; dān shēn; dà guǒ mù jiāng zǐ (Litsea lancilimba Merr.); xiǎo yè huáng yáng (Buxus sinica var. parvifolia M. Cheng); xiè bái (Bulbus Allii Macrostemii)                                                                |
| Quan Tian Ma capsule | tiān má                                                                                                                                                                                                                            |

---

**Supplementary Table 3****Detailed product information of Chinese herbal medicine explored in the included trials**

| <b>Study ID</b> | <b>Chinese herbal medicine</b>               | <b>Product name</b> | <b>Manufacturer of the product</b>                         |
|-----------------|----------------------------------------------|---------------------|------------------------------------------------------------|
| Dong 2015       | Ginkgo leaf extracts                         | SiTaiLong           | Shanghai Xingling<br>Technology Pharmaceutical             |
| Han 2016        | Ginkgo leaf extracts                         | SiTaiLong           | Shanghai Xingling<br>Technology Pharmaceutical             |
| Li 2013a        | Ginkgo leaf extracts                         | YiKangNing          | Yangzi River Pharmaceutical<br>Group                       |
| Wang 2012       | Ginkgo leaf extracts                         | SiTaiLong           | Shanghai Xingling<br>Technology Pharmaceutical<br>Co., Ltd |
| Xia 2013        | Ginkgo leaf extracts                         | DaNaiKang           | Beaufour Ipsen Industrie                                   |
| Xiao 2011       | Ginkgo leaf extracts                         | SiTaiLong           | Shanghai Xingling<br>Technology Pharmaceutical             |
| Zhang 2013      | Ginkgo leaf extracts                         | JinNaDuo            | Dr. Willmar Schwabe GmbH<br>& Co.KG                        |
| Zhang 2014      | Ginkgo leaf extracts                         | -                   | -                                                          |
| Zhang 2015a     | Extract of Ginkgo Biloba<br>Leaves Injection | XingXue             | ZBD Pharmaceutical                                         |
| He 2014         | Ginkgo leaf extracts                         | -                   | -                                                          |
| Su 2015         | Ginkgo leaf extracts                         | -                   | Yiling Pharmaceutical                                      |
| Zhang 2016      | Ginkgo leaf extracts                         | -                   | -                                                          |
| Jia 2011        | Tongxinluo                                   | -                   | Yiling Pharmaceutical                                      |
| Ye 2013         | Tongxinluo                                   | -                   | -                                                          |
| Yu 2017         | Fufang Haishe capsule                        | XiEnKai             | Hacon Pharmaceutical                                       |
| Liu 2008        | Yangxue Qingnao granules                     | -                   | -                                                          |
| Zhao 2011       | Yangxue Qingnao granules                     | -                   | -                                                          |
| Lan 2015        | Qizhi Tongluo capsule                        | -                   | -                                                          |
| Lin 2009        | Astragalus injection                         | -                   | Chengdu Diao<br>Pharmaceutical Co., Ltd                    |
| Wu 2017         | Tianmeng oral liquid                         | -                   | Rongchang Pharmaceuticals                                  |
| Zheng 2014      | Yindanxinnaotong soft capsule                | -                   | Guizhou Bailing Enterprise<br>Group Pharmaceutical         |
| Yakoot 2013     | Memo capsule                                 | -                   | -                                                          |
| Li 2009         | Quan Tian Ma capsule                         | -                   | Eakang Pharmaceutical                                      |
| Huang 2015      | Liuwei Dihuang pills                         | NingAnTang          | Hubei Ruihua<br>Pharmaceutical                             |
| Wang 2014       | Compound Congrong Yizhi capsule              | -                   | -                                                          |
| Zhang 2010      | Compound Congrong Yizhi capsule              | -                   | -                                                          |
| Yang 2020       | Yinxing Tongzhi tablets                      | SiTaiLong           | Shanghai Xingling<br>Technology Pharmaceutical<br>Co., Ltd |
| Chen 2017a      | Shenzhiling oral liquid                      | -                   | Wohua Pharmaceutical                                       |

|                |                                             |                                            |                                                                  |
|----------------|---------------------------------------------|--------------------------------------------|------------------------------------------------------------------|
| Gao 2015       | Compound Congrong Yizhi capsule             | -                                          | Liaoyuan Yulong Yadong<br>Pharmaceutical                         |
| Ouyang 2011    | Jiannaο Bushen pill                         | -                                          | Tsinghuawei Pharmaceutical                                       |
| Xie 2009       | Tianzhi granules                            | -                                          | Henan Wanxi Pharmaceutical                                       |
| Chen 2017b     | Compound Congrong Yizhi capsule             | -                                          | Liaoyuan Yulong Yadong<br>Pharmaceutical                         |
| Tian 2003      | Jinsiwei pill                               | -                                          | Henan Wanxi Pharmaceutical                                       |
| Zhang 2018     | Fufang Huonao Shu                           | -                                          | Jilin Province Huinan<br>Changlong Biochemical<br>Pharmaceutical |
| Zhu 2010       | Xuanyunning tablets                         | -                                          | Sanjin Group Guilin Sanjin<br>Biopharmaceuticals                 |
| Li 2013b       | Ginkgo tablets                              | YiKangNing                                 | Yangzi River Pharmaceutical<br>Group                             |
| Cai 2015       | Shuganjieyu capsule                         | -                                          | Kanghong Pharmaceutical                                          |
| Guo 2015       | Xinnaoning capsule                          | -                                          | Guizhou Antai<br>Pharmaceutical                                  |
| Meng 2012      | Compound Congrong Yizhi capsule             | -                                          | Liaoyuan Yulong Yadong<br>Pharmaceutical                         |
| Yuan 2013      | Huan Shao capsules                          | -                                          | Chongqing Sanxia Yunhai<br>Pharmaceutical                        |
| Dong 2017      | Gui Ling Ji capsule                         | -                                          | GuangYu Yuan<br>Pharmaceutical                                   |
| Zheng 2016     | Ginkgo biloba extract tablet                | -                                          | Beijing Sihuan<br>Pharmaceutical                                 |
| Zhu 2002       | Nao Li Bao pills                            | -                                          | Henan Wanxi Pharmaceutical                                       |
| Zhang 2015b    | Compound Congrong Yizhi                     | -                                          | Liaoyuan Yulong Yadong<br>Pharmaceutical                         |
| Gavrilova 2014 | Ebb 761 (Ginkgo biloba extracts<br>tablets) | -                                          | -                                                                |
| Liu 2020       | Zhongfeng Huichun tablet, 5 tablets         | Zhongfeng Huichun tablet<br>Yuzhou Yaowang | Henan Yuzhou Yaowang<br>Pharmaceutical                           |
| Guo 2020       | Jinlida granules                            | -                                          | Yiling Pharmaceutical                                            |
| Gschwind 2017  | GBE 1370                                    | -                                          | Symfona® forte                                                   |



## Supplementary Figures

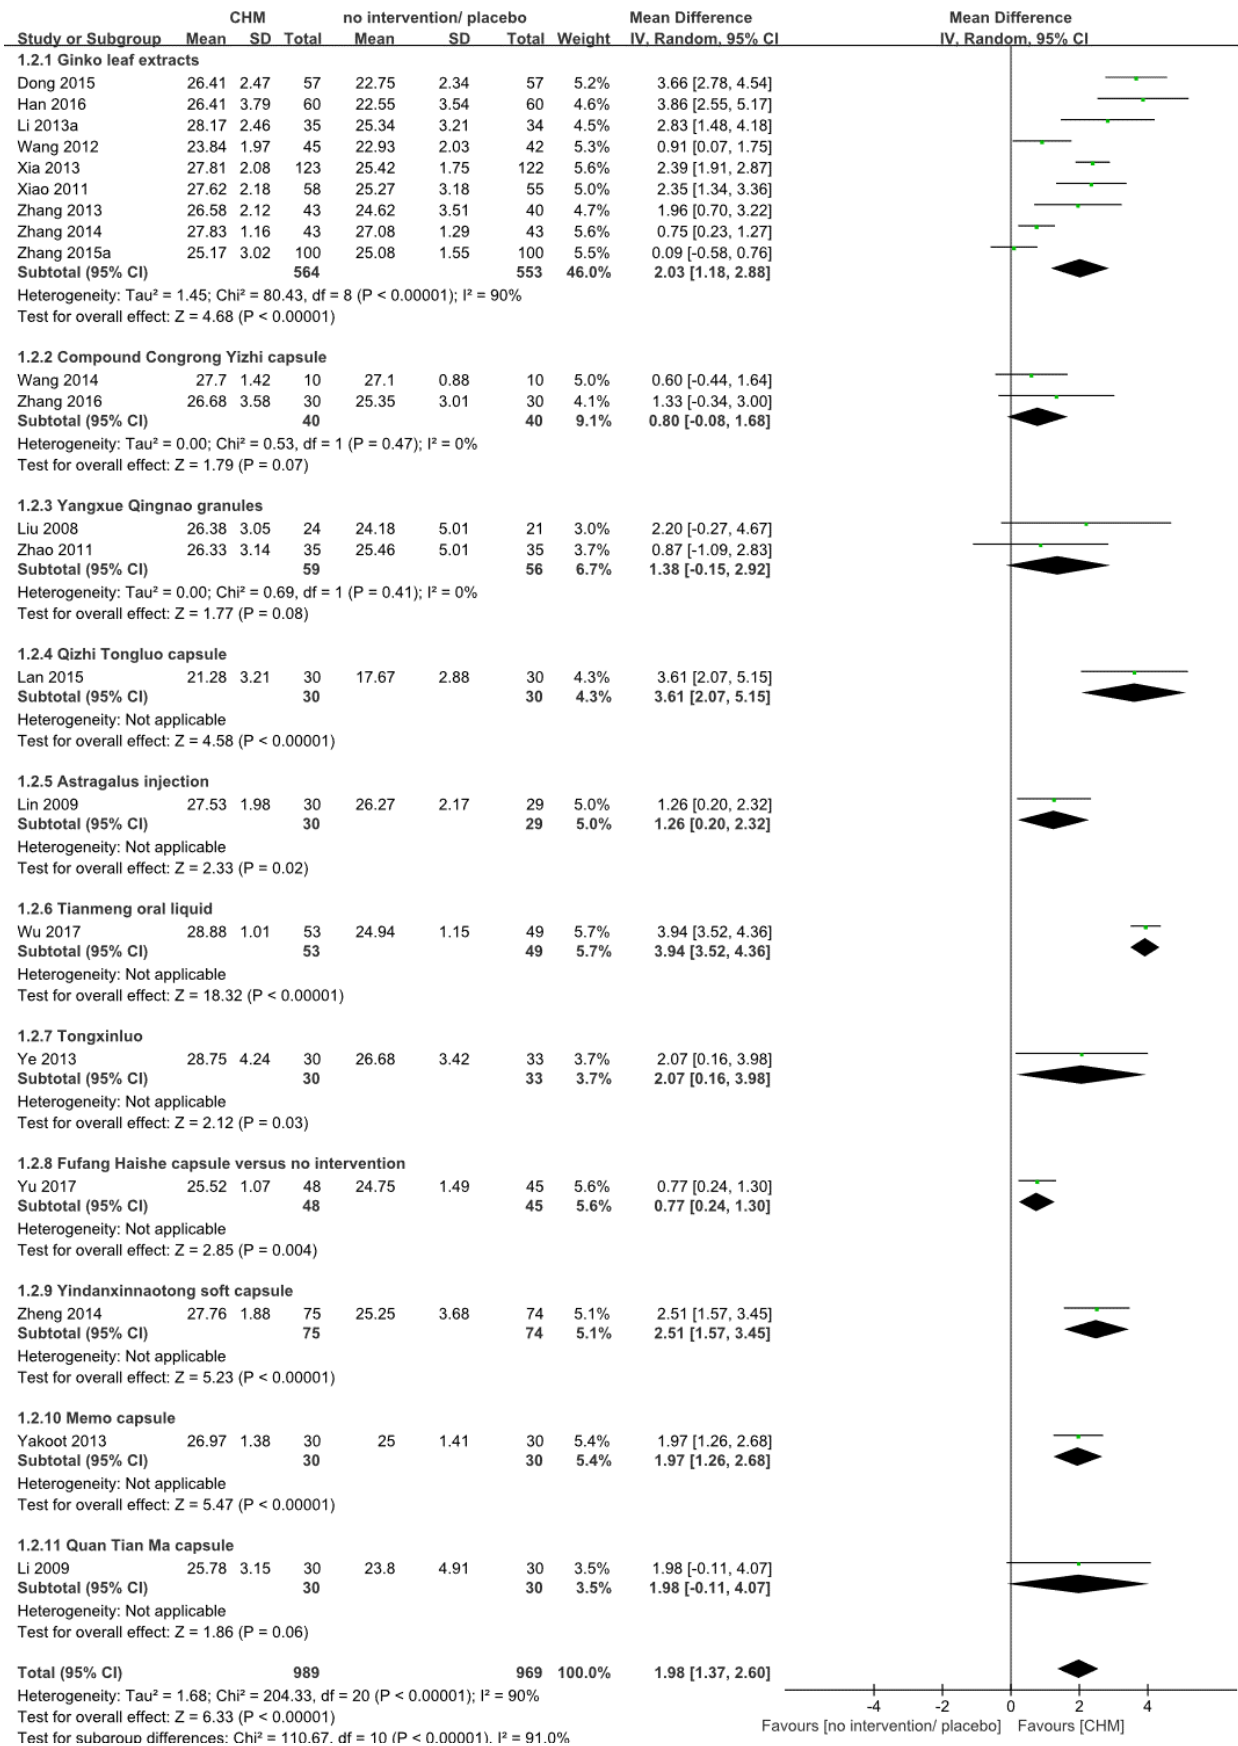

**Supplementary Fig. 1.** Forest plot of subgroup analyses of comparing trials with different Chinese herbal medicine and no intervention/ placebo, outcome: MMSE

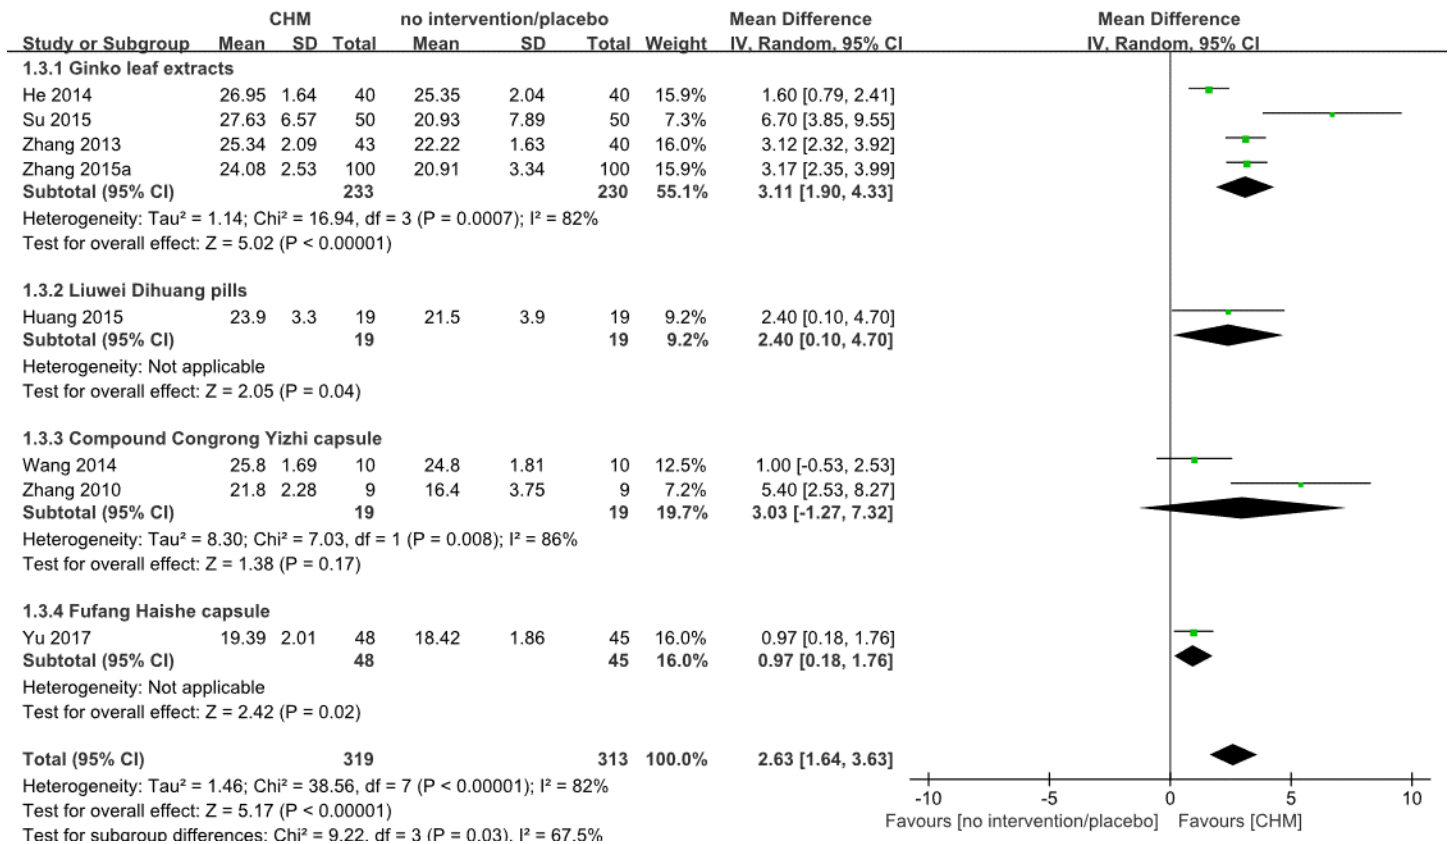

**Supplementary Fig. 2.** Forest plot of subgroup analyses of comparing trials with different Chinese herbal medicine and no intervention/ placebo, outcome: MoCA

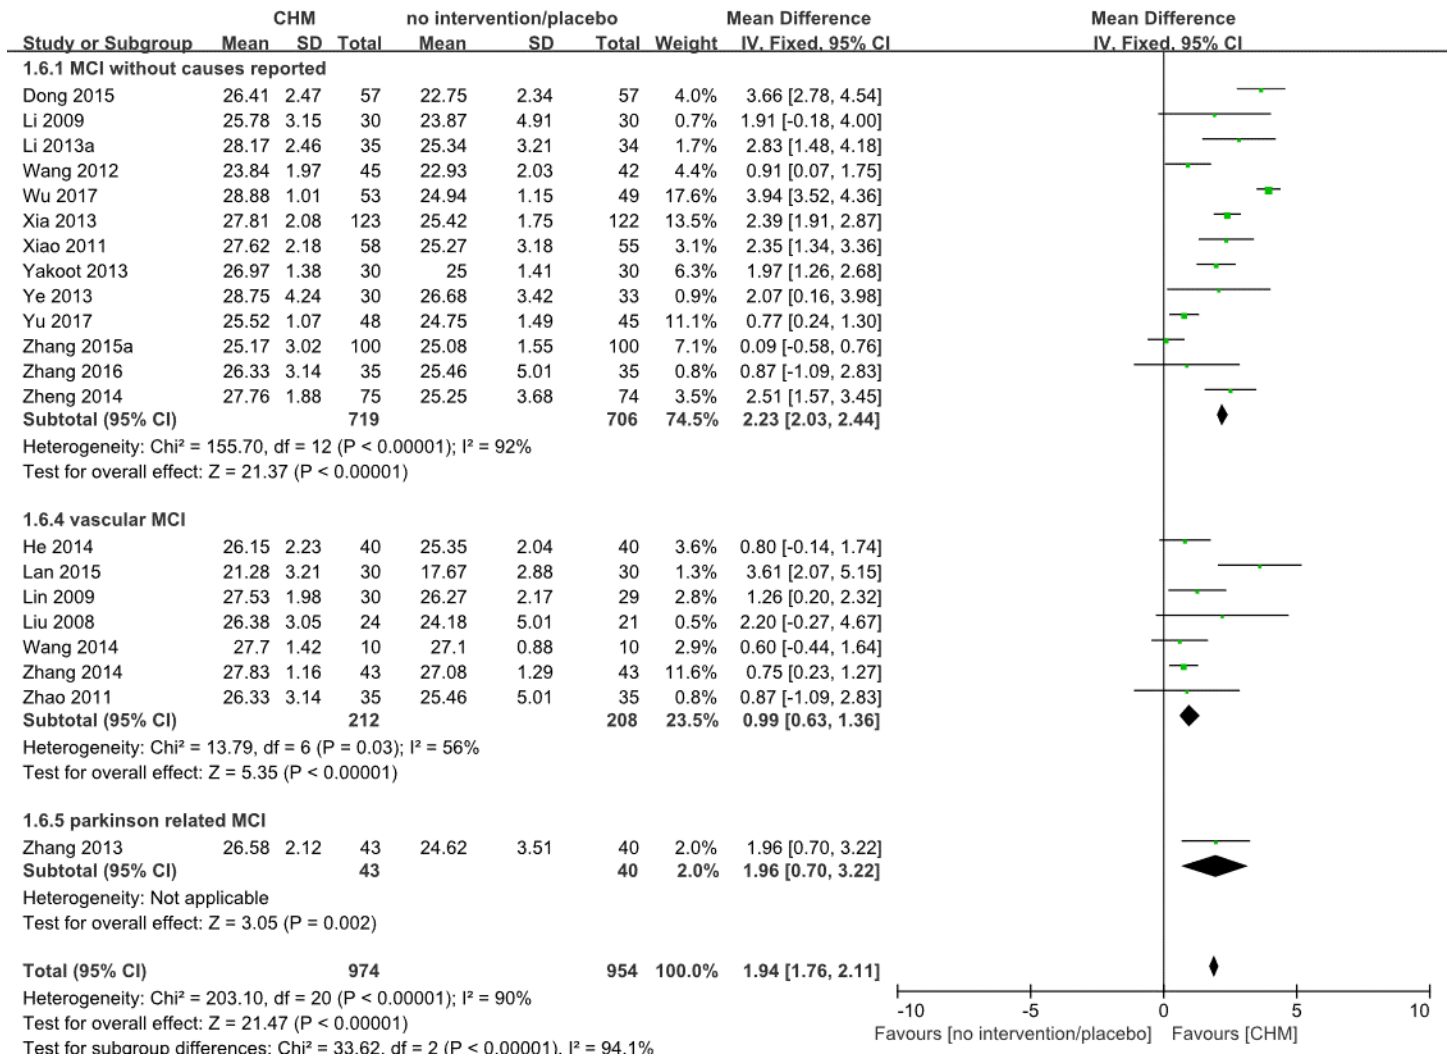

**Supplementary Fig. 3.** Forest plot of subgroup analyses of comparing trials with different causes of MCI of Chinese herbal medicine versus no intervention/ placebo, outcome: MMSE

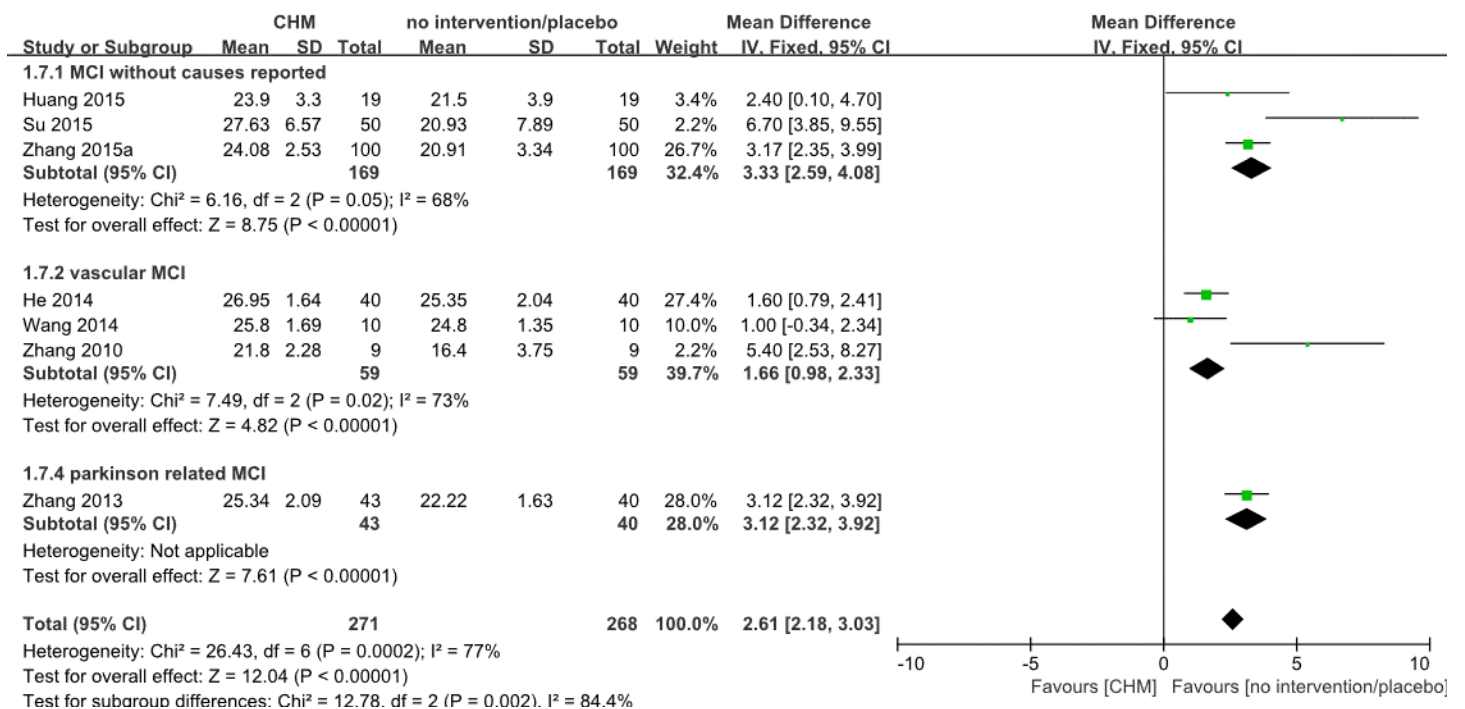

**Supplementary Fig. 4.** Forest plot of subgroup analyses of comparing trials with different causes of MCI of Chinese herbal medicine versus no intervention/ placebo, outcome: MoCA

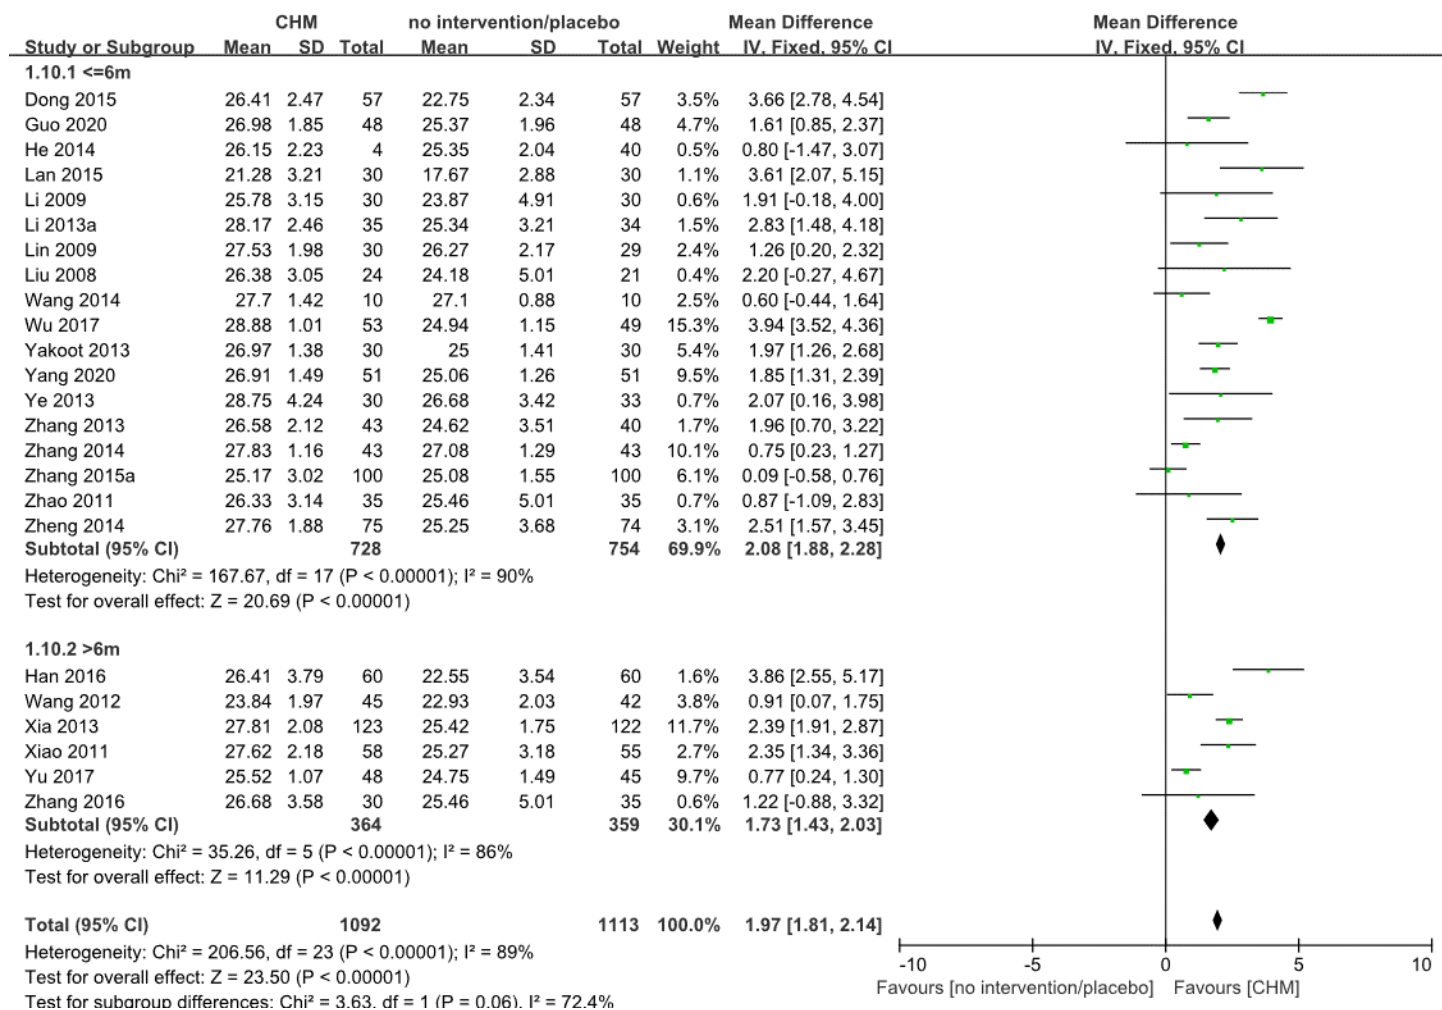

**Supplementary Fig. 5.** Forest plot of subgroup analyses of comparing trials with different treatment duration of Chinese herbal medicine versus no intervention/ placebo, outcome: MMSE

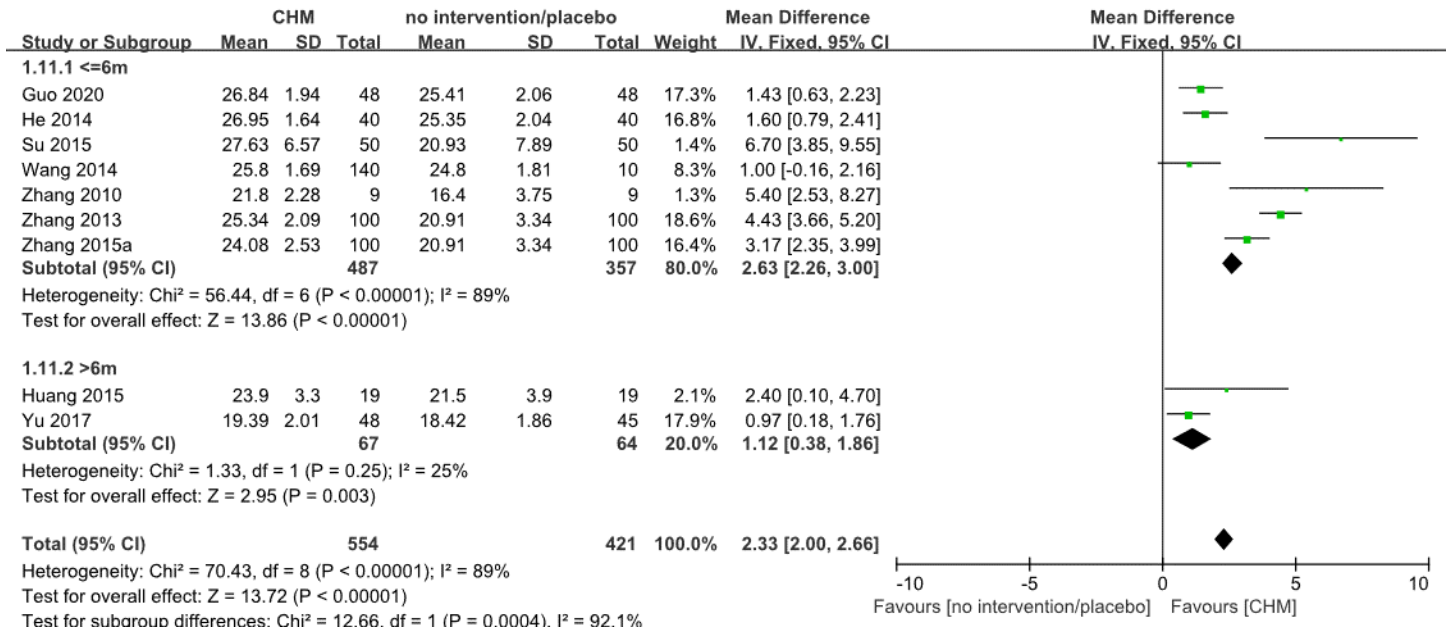

**Supplementary Fig. 6.** Forest plot of subgroup analyses of comparing trials with different treatment duration of Chinese herbal medicine versus no intervention/ placebo, outcome: MoCA

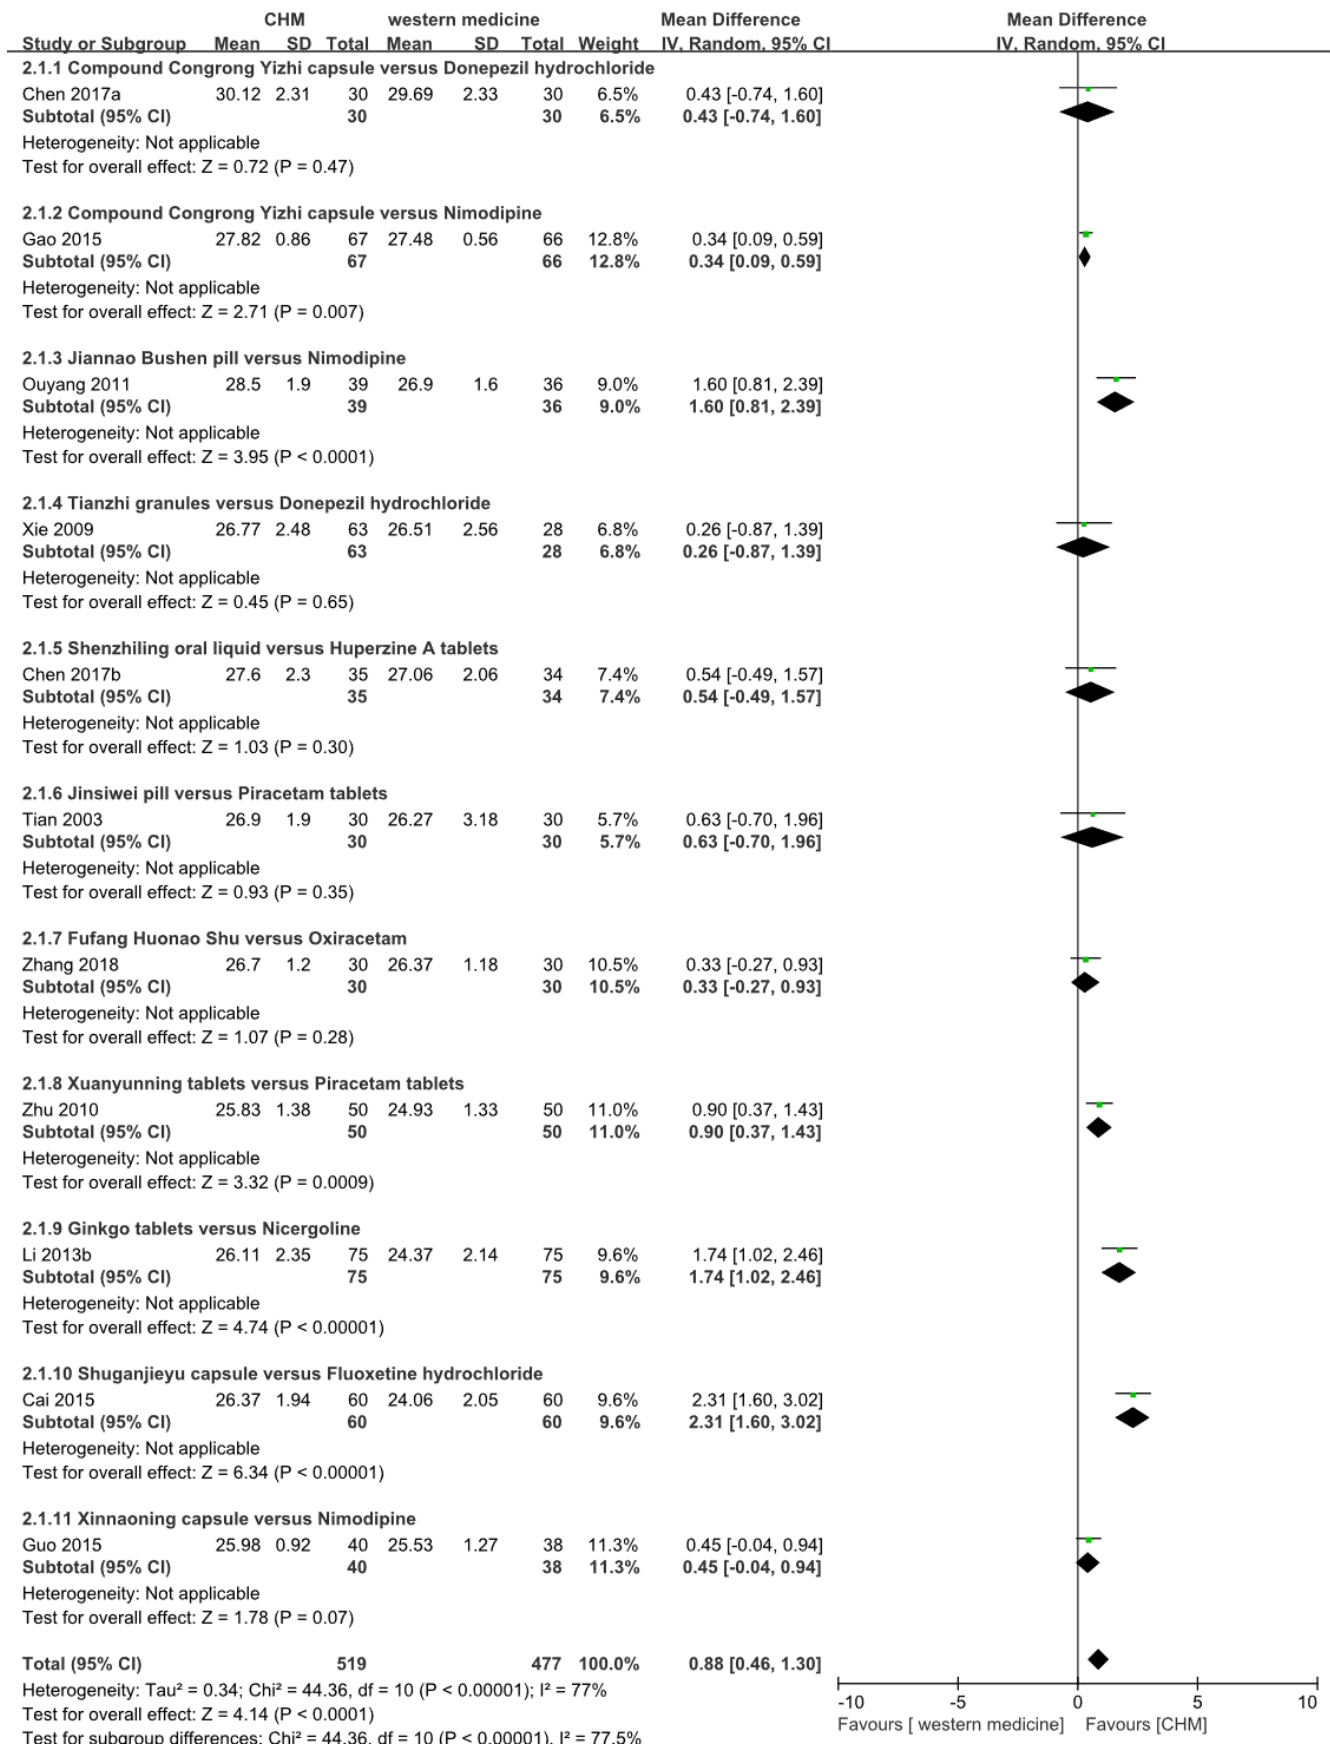

**Supplementary Fig. 7.** Forest plot of subgroup analyses of different intervention of Chinese herbal medicine versus western medicine, outcome: MMSE



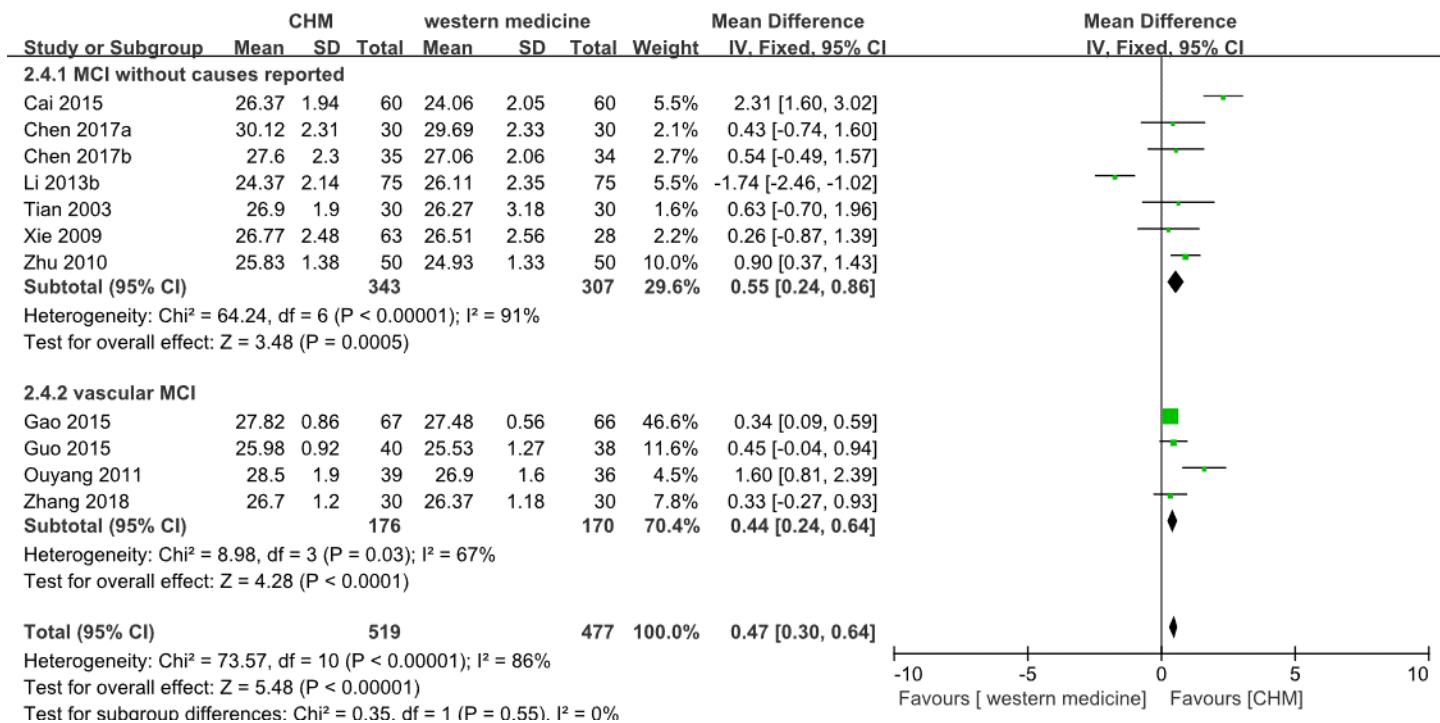

**Supplementary Fig. 8.** Forest plot of subgroup analyses of different causes of MCI of Chinese herbal medicine versus western medicine, outcome: MMSE

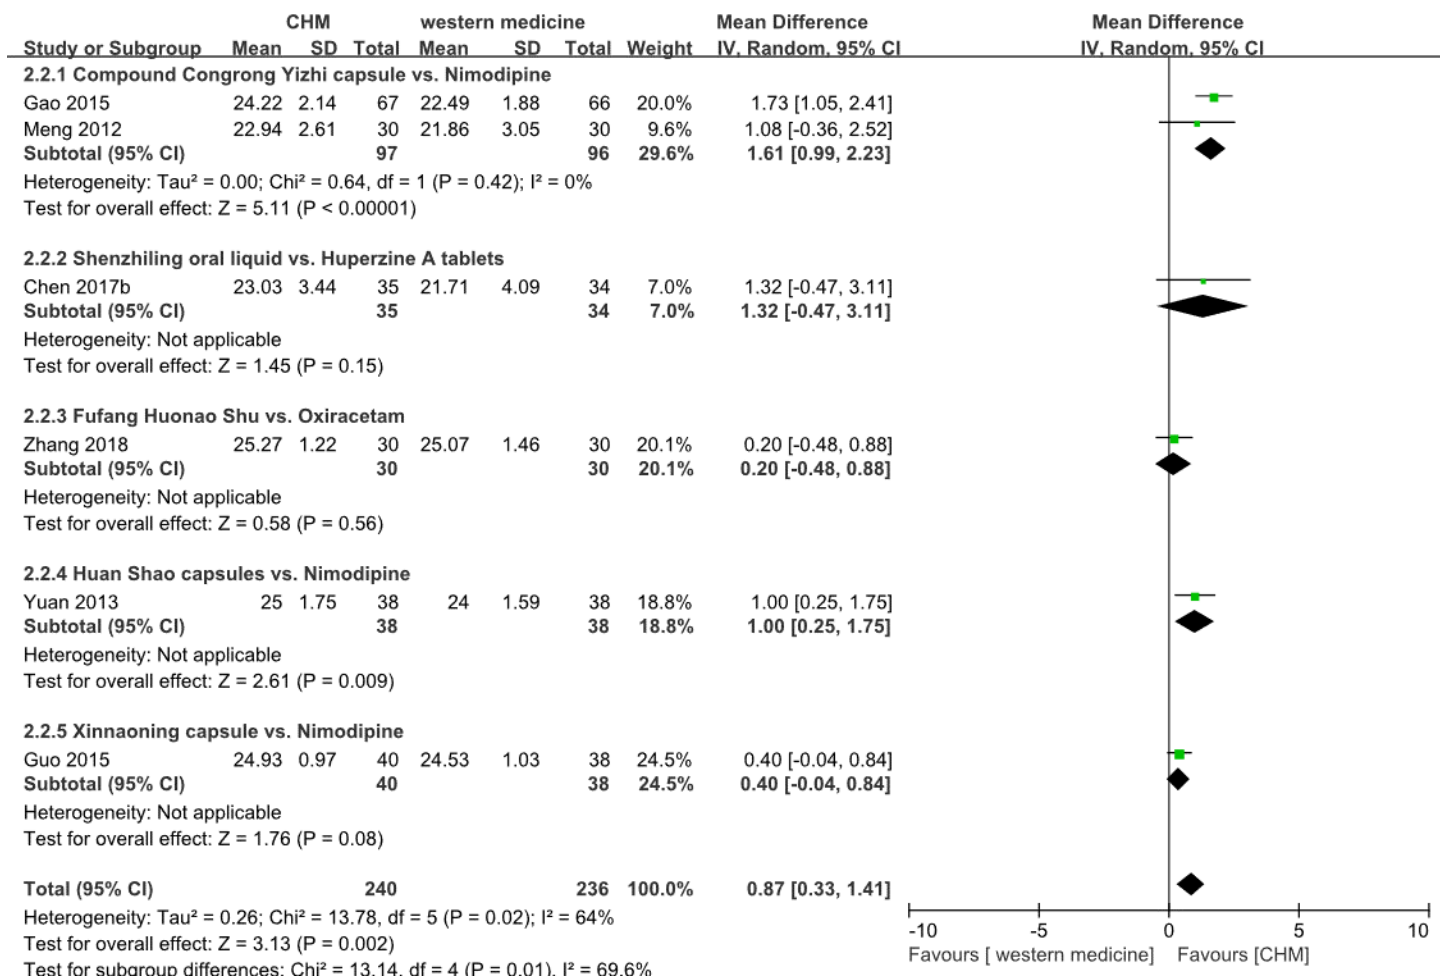

**Supplementary Fig. 9.** Forest plot of subgroup analyses of different intervention of Chinese herbal medicine versus western medicine, outcome: MoCA



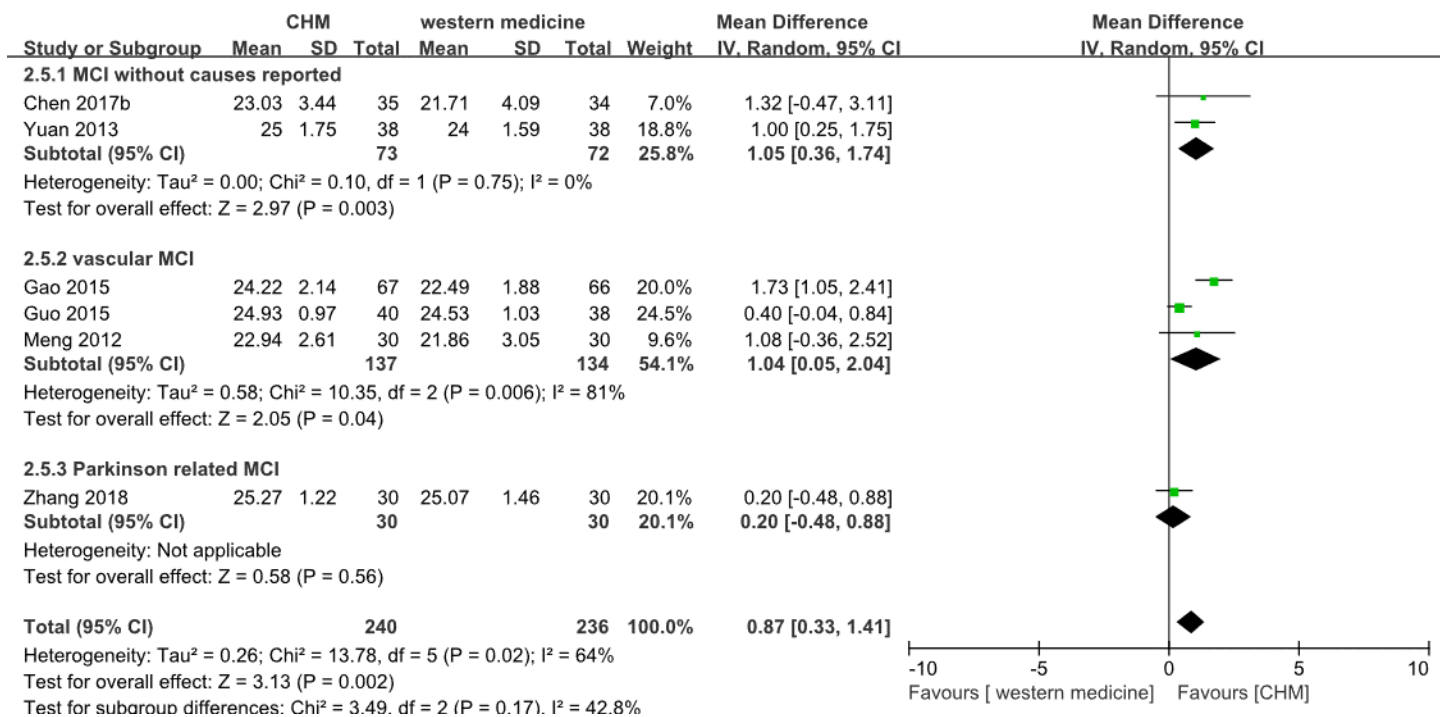

**Supplementary Fig. 10.** Forest plot of subgroup analyses of different causes of MCI of Chinese herbal medicine versus western medicine, outcome: MoCA

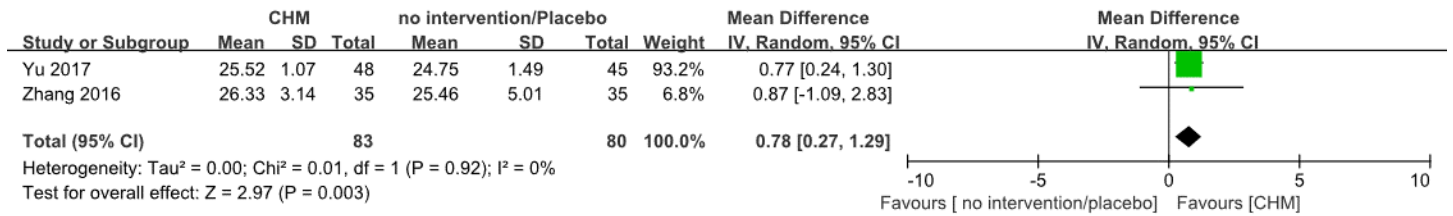

**Supplementary Fig. 11.** Forest plot of subgroup analyses of amnesic MCI of Chinese herbal medicine versus no intervention/placebo, outcome: MMSE

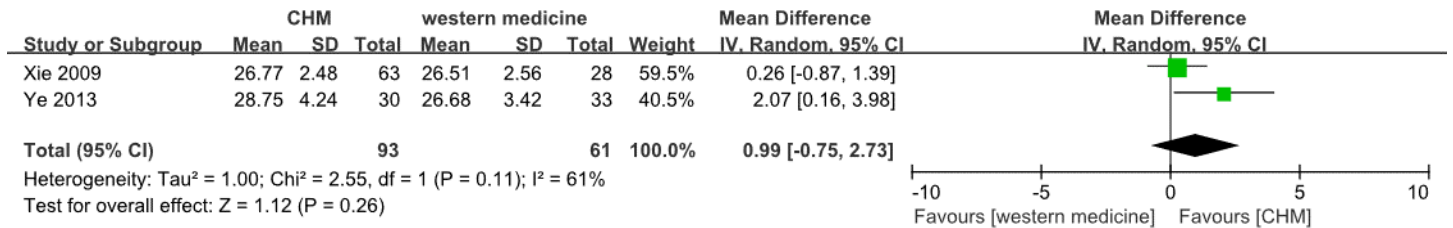

**Supplementary Fig. 12.** Forest plot of subgroup analyses of amnesic MCI of Chinese herbal medicine versus western medicine, outcome: MMSE

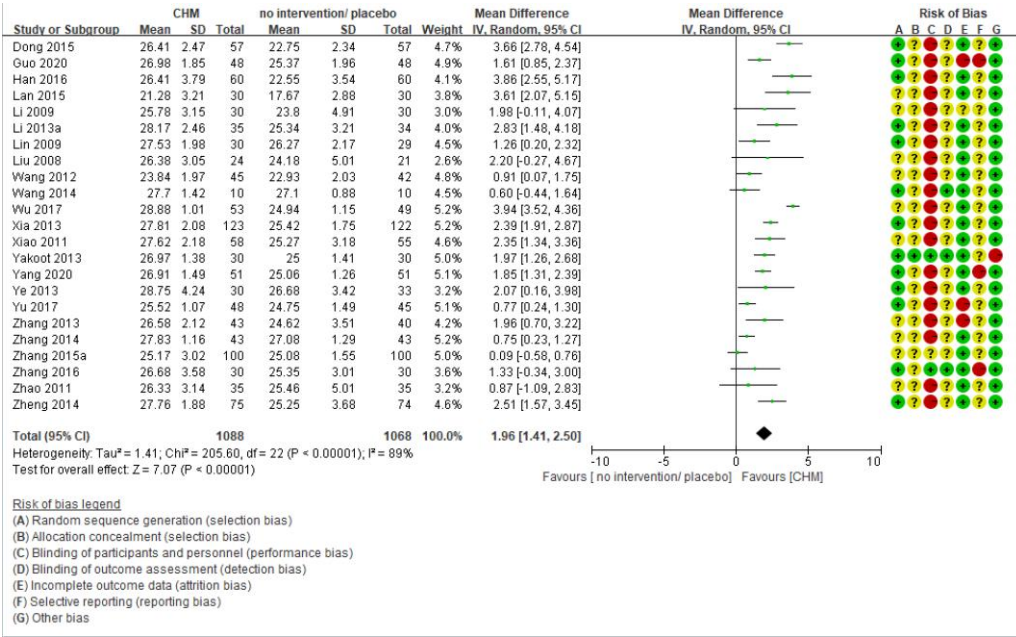

(A)

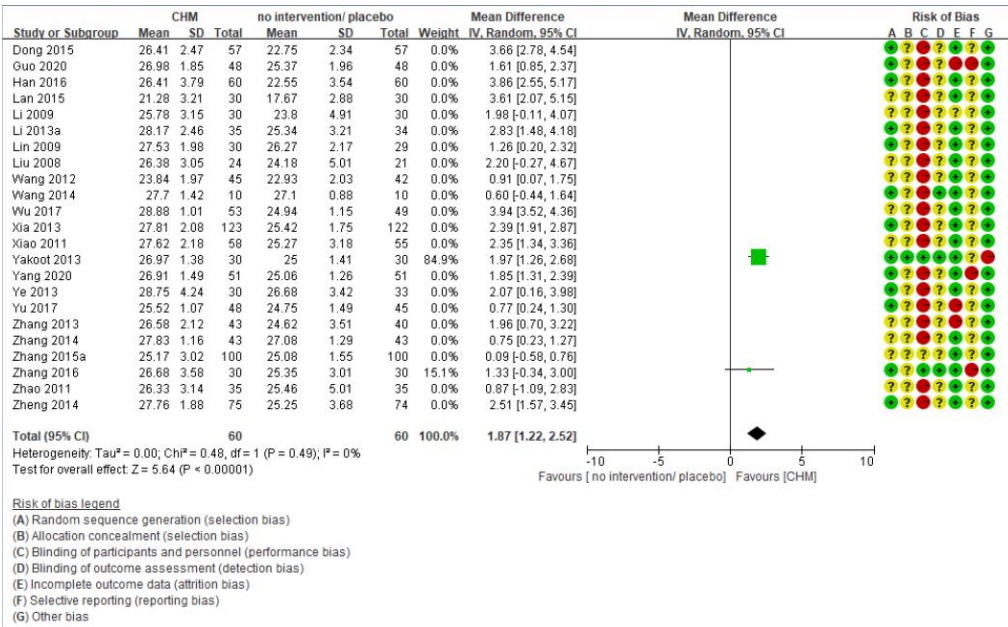

(B)

**Supplementary Fig. 13.** Forest plots of Chinese patent medicine versus no intervention/ placebo including all trials (A) and including trials with lower risk of bias (B), outcome: MMSE
